# Supplementary material
Source: PubMed Central journal article supplement (PMC6438190)
Supplement: NIHMS1524996-supplement-10439_2019_2216_MOESM1_ESM.pdf [file NIHMS1524996-supplement-10439_2019_2216_MOESM1_ESM.pdf]

## SUPPLEMENTARY MATERIAL

### **Title:**

Selection Procedures for the Largest Lyapunov Exponent in Gait Biomechanics

### **Authors:**

Peter C. Raffalt<sup>1,2,3</sup>, Jenny A. Kent<sup>3</sup>, Shane R. Wurdeman<sup>3,4</sup> and Nicholas Stergiou<sup>3,5</sup>

### **Affiliations:**

1 Julius Wolff Institute for Biomechanics and Musculoskeletal Regeneration, Charité –  
Universitätsmedizin Berlin, Augustenburger Platz 1, 13353 Berlin, Germany.

2 Department of Biomedical Sciences, University of Copenhagen, Blegdamsvej 3B, 2200,  
Copenhagen N, Denmark.

3 Department of Biomechanics and Center for Research in Human Movement Variability,  
University of Nebraska at Omaha, 6160 University Drive, Omaha, NE 68182-0860, USA.

4 Department of Clinical and Scientific Affairs, Hanger Clinic, 11155 S. Main St., Houston, TX  
77025, USA

5 College of Public Health, 984355 University of Nebraska Medical Center, Omaha, NE 68198-  
4355, USA.

### **Corresponding Author:**

Nicholas Stergiou, PhD

Department of Biomechanics and Center for Research in Human Movement Variability

University of Nebraska at Omaha

6160 University Drive

Omaha, NE 68182-0860, USA.

Email: [nstergiou@unomaha.edu](mailto:nstergiou@unomaha.edu)

Phone: 402-554-3247

## State space reconstruction with individual time lag and embedding dimension

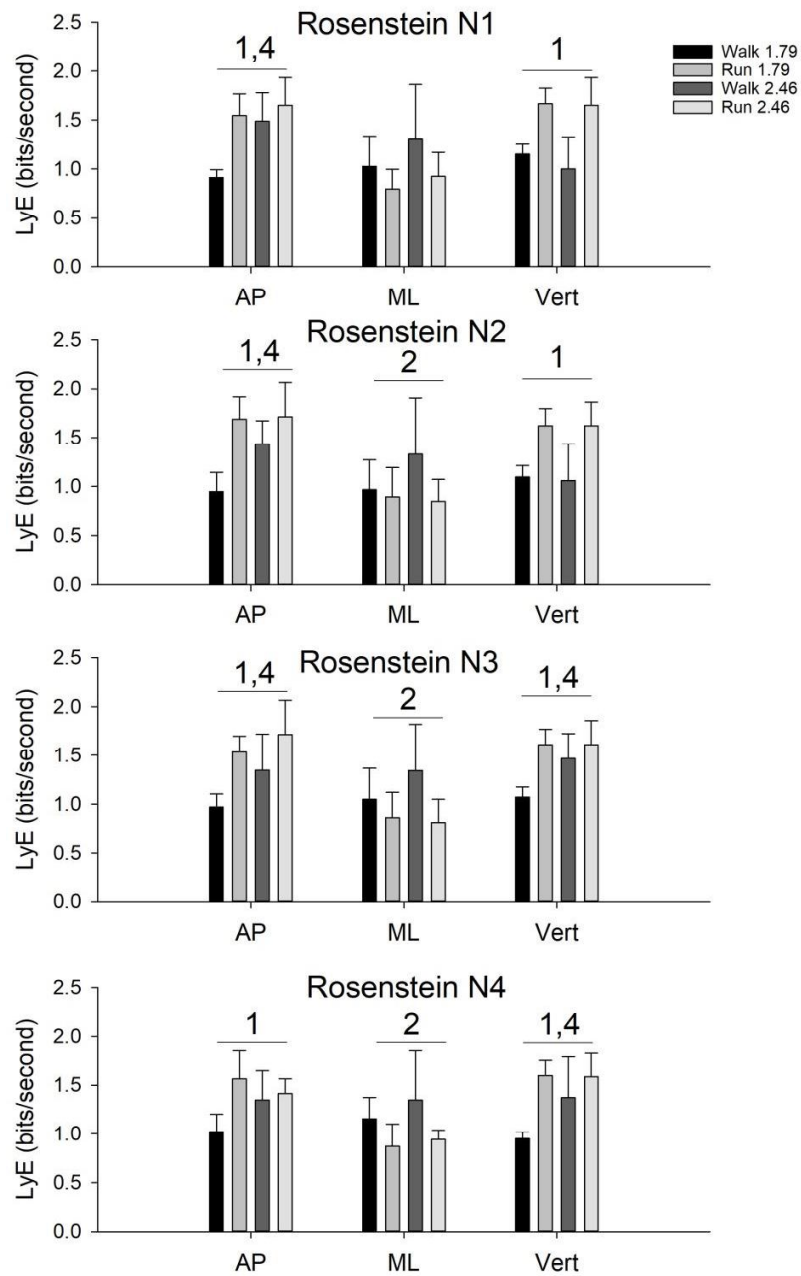

**Figure S1:** LyE calculated with an individual time lag and embedding dimension from the anterior-posterior (AP), mediolateral (ML) and vertical (Vert) displacement of the sacrum marker during the four conditions using the Rosenstein et al. algorithm and the four different normalization procedures. 1 above the bars indicates significantly higher LyE for the sacrum displacements during running at the low speed compared to walking at the low speed, 4 above the bars indicates significantly higher LyE for the sacrum displacements during walking at the high speed compared to walking at the low speed.

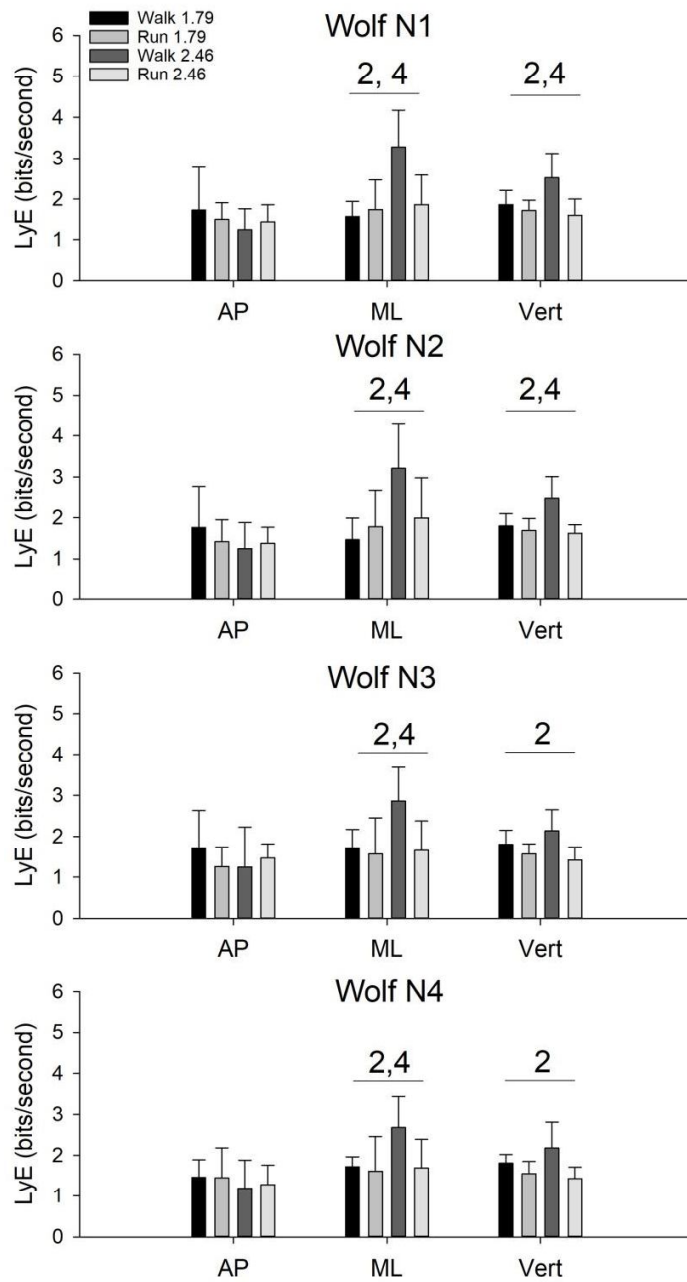

**Figure S2:** LyE calculated with an individual time lag and embedding dimension from the anterior-posterior (AP), mediolateral (ML) and vertical (Vert) displacement of the sacrum marker during the four conditions using the Wolf et al. algorithm and the four different normalization procedures. 2 above the bars indicates significantly higher LyE for the sacrum displacements during walking at the high speed compared to running at the high speed, 4 above the bars indicates significantly higher LyE for the sacrum displacements during walking at the high speed compared to walking at the low speed.

**Table S1:** Confirmed criteria and sensitivity for the LyE calculated with an individual time lag and embedding dimension and using the Rosenstein et al. algorithm for the anterior-posterior, mediolateral and vertical displacement of the sacrum marker.

|                                   | Confirmed criteria | Sensitivity (%) |
|-----------------------------------|--------------------|-----------------|
| Rosenstein et al. normalization 1 |                    |                 |
| Anterior-posterior                | 1, 4               | 58.8            |
| Mediolateral                      | -                  | 38.2            |
| Vertical                          | 1                  | 41.2            |
| Mean across direction             | NA                 | 46.1 ± 11.1     |
| Rosenstein et al. normalization 2 |                    |                 |
| Anterior-posterior                | 1,4                | 58.8            |
| Mediolateral                      | 2                  | 47.1            |
| Vertical                          | 1                  | 41.2            |
| Mean across direction             | NA                 | 49.0 ± 9.0      |
| Rosenstein et al. normalization 3 |                    |                 |
| Anterior-posterior                | 1, 4               | 52.9            |
| Mediolateral                      | 2                  | 50.0            |
| Vertical                          | 1, 4               | 52.9            |
| Mean across direction             | NA                 | 52.0 ± 1.7      |
| Rosenstein et al. normalization 4 |                    |                 |
| Anterior-posterior                | 1                  | 52.9            |
| Mediolateral                      | 2                  | 44.1            |
| Vertical                          | 1, 4               | 67.6            |
| Mean across direction             | NA                 | 54.9 ± 11.9     |

**Table S2:** Confirmed criteria and sensitivity for the LyE calculated with an individual time lag and embedding dimension and using the Wolf et al. algorithm for the anterior-posterior, mediolateral and vertical displacement of the sacrum marker.

|                             | Confirmed criteria | Sensitivity (%) |
|-----------------------------|--------------------|-----------------|
| Wolf et al. normalization 1 |                    |                 |
| Anterior-posterior          | -                  | 26.5            |
| Mediolateral                | 2, 4               | 47.1            |
| Vertical                    | 2, 4               | 58.8            |
| Mean across direction       | NA                 | 44.1 ± 16.4     |
| Wolf et al. normalization 2 |                    |                 |
| Anterior-posterior          | -                  | 23.5            |
| Mediolateral                | 2, 4               | 44.1            |
| Vertical                    | 2, 4               | 61.8            |
| Mean across direction       | NA                 | 43.1 ± 19.1     |
| Wolf et al. normalization 3 |                    |                 |
| Anterior-posterior          | -                  | 11.8            |
| Mediolateral                | 2, 4               | 44.1            |
| Vertical                    | 2                  | 50.0            |
| Mean across direction       | NA                 | 35.3 ± 20.6     |
| Wolf et al. normalization 4 |                    |                 |
| Anterior-posterior          | -                  | 23.8            |
| Mediolateral                | 2, 4               | 44.1            |
| Vertical                    | 2                  | 50.0            |
| Mean across direction       | NA                 | 39.2 ± 13.9     |

**Table S3:** Statistical outcome from One-way ANOVA for repeated measure and post hoc test, with Rosenstein et al. algorithm and first normalization procedure.

| Rosenstein et al. algorithm | Normalization 1 Anterior-posterior direction – overall effect of locomotion mode: NS |          |           |          |
|-----------------------------|--------------------------------------------------------------------------------------|----------|-----------|----------|
|                             | Walk 1.79                                                                            | Run 1.79 | Walk 2.46 | Run 2.46 |
| Walk 1.79                   |                                                                                      | NA       | NA        | NA       |
| Run 1.79                    | NA                                                                                   |          | NA        | NA       |
| Walk 2.46                   | NA                                                                                   | NA       |           | NA       |
| Run 2.46                    | NA                                                                                   | NA       | NA        |          |

  

| Rosenstein et al. algorithm | Normalization 1 Mediolateral direction – overall effect of locomotion mode: p < 0.001 |           |           |           |
|-----------------------------|---------------------------------------------------------------------------------------|-----------|-----------|-----------|
|                             | Walk 1.79                                                                             | Run 1.79  | Walk 2.46 | Run 2.46  |
| Walk 1.79                   |                                                                                       | p = 0.01  | p < 0.001 | p = 0.012 |
| Run 1.79                    | p = 0.01                                                                              |           | p = 0.027 | NS        |
| Walk 2.46                   | p < 0.001                                                                             | p = 0.027 |           | p = 0.027 |
| Run 2.46                    | p = 0.012                                                                             | NS        | p = 0.027 |           |

  

| Rosenstein et al. algorithm | Normalization 1 Vertical direction – overall effect of locomotion mode: p < 0.001 |           |           |           |
|-----------------------------|-----------------------------------------------------------------------------------|-----------|-----------|-----------|
|                             | Walk 1.79                                                                         | Run 1.79  | Walk 2.46 | Run 2.46  |
| Walk 1.79                   |                                                                                   | p < 0.001 | NS        | p < 0.001 |
| Run 1.79                    | p < 0.001                                                                         |           | p < 0.001 | NS        |
| Walk 2.46                   | NS                                                                                | < 0.001   |           | p < 0.001 |
| Run 2.46                    | p < 0.001                                                                         | NS        | p < 0.001 |           |

**Table S4:** Statistical outcome from One-way ANOVA for repeated measure and post hoc test, with Rosenstein et al. algorithm and second normalization procedure.

| Rosenstein et al. algorithm | Normalization 2 Anterior-posterior – overall effect of locomotion mode: NS |          |           |          |
|-----------------------------|----------------------------------------------------------------------------|----------|-----------|----------|
|                             | Walk 1.79                                                                  | Run 1.79 | Walk 2.46 | Run 2.46 |
| Walk 1.79                   |                                                                            | NA       | NA        | NA       |
| Run 1.79                    | NA                                                                         |          | NA        | NA       |
| Walk 2.46                   | NA                                                                         | NA       |           | NA       |
| Run 2.46                    | NA                                                                         | NA       | NA        |          |

  

| Rosenstein et al. algorithm | Normalization 2 Mediolateral – overall effect of locomotion mode: p < 0.001 |           |           |           |
|-----------------------------|-----------------------------------------------------------------------------|-----------|-----------|-----------|
|                             | Walk 1.79                                                                   | Run 1.79  | Walk 2.46 | Run 2.46  |
| Walk 1.79                   |                                                                             | p = 0.002 | p < 0.001 | p = 0.002 |
| Run 1.79                    | p = 0.002                                                                   |           | NS        | NS        |
| Walk 2.46                   | p < 0.001                                                                   | NS        |           | NS        |
| Run 2.46                    | p = 0.002                                                                   | NS        | NS        |           |

  

| Rosenstein et al. algorithm | Normalization 2 Vertical – overall effect of locomotion mode: p < 0.001 |           |           |           |
|-----------------------------|-------------------------------------------------------------------------|-----------|-----------|-----------|
|                             | Walk 1.79                                                               | Run 1.79  | Walk 2.46 | Run 2.46  |
| Walk 1.79                   |                                                                         | p < 0.001 | NS        | p < 0.001 |
| Run 1.79                    | p < 0.001                                                               |           | p < 0.001 | NS        |
| Walk 2.46                   | NS                                                                      | p < 0.001 |           | p < 0.001 |
| Run 2.46                    | p < 0.001                                                               | NS        | p < 0.001 |           |

**Table S5:** Statistical outcome from One-way ANOVA for repeated measure and post hoc test, with Rosenstein et al. algorithm and third normalization procedure.

| Rosenstein et al. algorithm | Normalization 3 Anterior-posterior – overall effect of locomotion mode: $p = 0.004$ |             |             |             |
|-----------------------------|-------------------------------------------------------------------------------------|-------------|-------------|-------------|
|                             | Walk 1.79                                                                           | Run 1.79    | Walk 2.46   | Run 2.46    |
| Walk 1.79                   |                                                                                     | $p = 0.007$ | $p = 0.038$ | $p = 0.011$ |
| Run 1.79                    | $p = 0.007$                                                                         |             | NS          | NS          |
| Walk 2.46                   | $p = 0.038$                                                                         | NS          |             | NS          |
| Run 2.46                    | $p = 0.011$                                                                         | NS          | NS          |             |

  

| Rosenstein et al. algorithm | Normalization 3 Mediolateral – overall effect of locomotion mode: $p < 0.001$ |             |             |             |
|-----------------------------|-------------------------------------------------------------------------------|-------------|-------------|-------------|
|                             | Walk 1.79                                                                     | Run 1.79    | Walk 2.46   | Run 2.46    |
| Walk 1.79                   |                                                                               | $p = 0.014$ | $p < 0.001$ | $p = 0.022$ |
| Run 1.79                    | $p = 0.014$                                                                   |             | $p = 0.024$ | NS          |
| Walk 2.46                   | $p < 0.001$                                                                   | $p = 0.024$ |             | $p = 0.019$ |
| Run 2.46                    | $p = 0.022$                                                                   | NS          | $p = 0.019$ |             |

  

| Rosenstein et al. algorithm | Normalization 3 Vertical – overall effect of locomotion mode: $p < 0.001$ |             |             |             |
|-----------------------------|---------------------------------------------------------------------------|-------------|-------------|-------------|
|                             | Walk 1.79                                                                 | Run 1.79    | Walk 2.46   | Run 2.46    |
| Walk 1.79                   |                                                                           | $p < 0.001$ | $p = 0.001$ | $p < 0.001$ |
| Run 1.79                    | $p < 0.001$                                                               |             | NS          | NS          |
| Walk 2.46                   | $p = 0.001$                                                               | NS          |             | NS          |
| Run 2.46                    | $p < 0.001$                                                               | NS          | NS          |             |

**Table S6:** Statistical outcome from One-way ANOVA for repeated measure and post hoc test, with Rosenstein et al. algorithm and fourth normalization procedure.

| Rosenstein et al. algorithm | Normalization 4 Anterior-posterior direction – overall effect of locomotion mode: $p = 0.014$ |             |           |             |
|-----------------------------|-----------------------------------------------------------------------------------------------|-------------|-----------|-------------|
|                             | Walk 1.79                                                                                     | Run 1.79    | Walk 2.46 | Run 2.46    |
| Walk 1.79                   |                                                                                               | $p = 0.021$ | NS        | $p = 0.035$ |
| Run 1.79                    | $p = 0.021$                                                                                   |             | NS        | NS          |
| Walk 2.46                   | NS                                                                                            | NS          |           | NS          |
| Run 2.46                    | $p = 0.035$                                                                                   | NS          | NS        |             |

  

| Rosenstein et al. algorithm | Normalization 4 Mediolateral direction – overall effect of locomotion mode: $p = 0.003$ |          |             |          |
|-----------------------------|-----------------------------------------------------------------------------------------|----------|-------------|----------|
|                             | Walk 1.79                                                                               | Run 1.79 | Walk 2.46   | Run 2.46 |
| Walk 1.79                   |                                                                                         | NS       | $p = 0.001$ | NS       |
| Run 1.79                    | NS                                                                                      |          | NS          | NS       |
| Walk 2.46                   | $p = 0.001$                                                                             | NS       |             | NS       |
| Run 2.46                    | NS                                                                                      | NS       | NS          |          |

  

| Rosenstein et al. algorithm | Normalization 4 Vertical direction – overall effect of locomotion mode: $p < 0.001$ |             |             |             |
|-----------------------------|-------------------------------------------------------------------------------------|-------------|-------------|-------------|
|                             | Walk 1.79                                                                           | Run 1.79    | Walk 2.46   | Run 2.46    |
| Walk 1.79                   |                                                                                     | $p < 0.001$ | $p < 0.001$ | $p < 0.001$ |
| Run 1.79                    | $p < 0.001$                                                                         |             | NS          | NS          |
| Walk 2.46                   | $p < 0.001$                                                                         | NS          |             | NS          |
| Run 2.46                    | $p < 0.001$                                                                         | NS          | NS          |             |

**Table S7:** Statistical outcome from One-way ANOVA for repeated measure and post hoc test, with Wolf et al. algorithm and first normalization procedure.

| Wolf et al. algorithm | Normalization 1 Anterior-posterior – overall effect of locomotion mode: NS |          |           |          |
|-----------------------|----------------------------------------------------------------------------|----------|-----------|----------|
|                       | Walk 1.79                                                                  | Run 1.79 | Walk 2.46 | Run 2.46 |
| Walk 1.79             |                                                                            | NA       | NA        | NA       |
| Run 1.79              | NA                                                                         |          | NA        | NA       |
| Walk 2.46             | NA                                                                         | NA       |           | NA       |
| Run 2.46              | NA                                                                         | NA       | NA        |          |

  

| Wolf et al. algorithm | Normalization 1 Mediolateral – overall effect of locomotion mode: p = 0.017 |          |           |          |
|-----------------------|-----------------------------------------------------------------------------|----------|-----------|----------|
|                       | Walk 1.79                                                                   | Run 1.79 | Walk 2.46 | Run 2.46 |
| Walk 1.79             |                                                                             | NS       | p = 0.012 | NS       |
| Run 1.79              | NS                                                                          |          | NS        | NS       |
| Walk 2.46             | p = 0.012                                                                   | NS       |           | NS       |
| Run 2.46              | NS                                                                          | NS       | NS        |          |

  

| Wolf et al. algorithm | Normalization 1 Vertical – overall effect of locomotion mode: p < 0.001 |           |           |           |
|-----------------------|-------------------------------------------------------------------------|-----------|-----------|-----------|
|                       | Walk 1.79                                                               | Run 1.79  | Walk 2.46 | Run 2.46  |
| Walk 1.79             |                                                                         | NS        | p < 0.001 | NS        |
| Run 1.79              | NS                                                                      |           | p < 0.001 | NS        |
| Walk 2.46             | p < 0.001                                                               | p < 0.001 |           | p < 0.001 |
| Run 2.46              | NS                                                                      | NS        | p < 0.001 |           |

**Table S8:** Statistical outcome from One-way ANOVA for repeated measure and post hoc test, with Wolf et al. algorithm and second normalization procedure.

| Wolf et al. algorithm | Normalization 2 Anterior-posterior – overall effect of locomotion mode: p = 0.035 |          |           |           |
|-----------------------|-----------------------------------------------------------------------------------|----------|-----------|-----------|
|                       | Walk 1.79                                                                         | Run 1.79 | Walk 2.46 | Run 2.46  |
| Walk 1.79             |                                                                                   | NS       | NS        | p = 0.040 |
| Run 1.79              | NS                                                                                |          | NS        | NS        |
| Walk 2.46             | NS                                                                                | NS       |           | NS        |
| Run 2.46              | p = 0.040                                                                         | NS       | NS        |           |

  

| Wolf et al. algorithm | Normalization 2 Mediolateral – overall effect of locomotion mode: p = 0.017 |          |           |          |
|-----------------------|-----------------------------------------------------------------------------|----------|-----------|----------|
|                       | Walk 1.79                                                                   | Run 1.79 | Walk 2.46 | Run 2.46 |
| Walk 1.79             |                                                                             | NS       | p = 0.011 | NS       |
| Run 1.79              | NS                                                                          |          | NS        | NS       |
| Walk 2.46             | p = 0.011                                                                   | NS       |           | NS       |
| Run 2.46              | NS                                                                          | NS       | NS        |          |

  

| Wolf et al. algorithm | Normalization 2 Vertical – overall effect of locomotion mode: p < 0.001 |           |           |           |
|-----------------------|-------------------------------------------------------------------------|-----------|-----------|-----------|
|                       | Walk 1.79                                                               | Run 1.79  | Walk 2.46 | Run 2.46  |
| Walk 1.79             |                                                                         | NS        | p < 0.001 | NS        |
| Run 1.79              | NS                                                                      |           | p < 0.001 | p < 0.001 |
| Walk 2.46             | p < 0.001                                                               | p < 0.001 |           | NS        |
| Run 2.46              | NS                                                                      | p < 0.001 | NS        |           |



**Table S9:** Statistical outcome from One-way ANOVA for repeated measure and post hoc test, with Wolf et al. algorithm and third normalization procedure.

| Wolf et al. algorithm | Normalization 3 Anterior-posterior – overall effect of locomotion mode: NS |          |           |          |
|-----------------------|----------------------------------------------------------------------------|----------|-----------|----------|
|                       | Walk 1.79                                                                  | Run 1.79 | Walk 2.46 | Run 2.46 |
| Walk 1.79             |                                                                            | NA       | NA        | NA       |
| Run 1.79              | NA                                                                         |          | NA        | NA       |
| Walk 2.46             | NA                                                                         | NA       |           | NA       |
| Run 2.46              | NA                                                                         | NA       | NA        |          |

  

| Wolf et al. algorithm | Normalization 3 Mediolateral – overall effect of locomotion mode: NS |          |           |          |
|-----------------------|----------------------------------------------------------------------|----------|-----------|----------|
|                       | Walk 1.79                                                            | Run 1.79 | Walk 2.46 | Run 2.46 |
| Walk 1.79             |                                                                      | NA       | NA        | NA       |
| Run 1.79              | NA                                                                   |          | NA        | NA       |
| Walk 2.46             | NA                                                                   | NA       |           | NA       |
| Run 2.46              | NA                                                                   | NA       | NA        |          |

  

| Wolf et al. algorithm | Normalization 3 Vertical – overall effect of locomotion mode: p < 0.001 |           |           |           |
|-----------------------|-------------------------------------------------------------------------|-----------|-----------|-----------|
|                       | Walk 1.79                                                               | Run 1.79  | Walk 2.46 | Run 2.46  |
| Walk 1.79             |                                                                         | p = 0.030 | p < 0.001 | p = 0.025 |
| Run 1.79              | p = 0.030                                                               |           | p < 0.001 | NS        |
| Walk 2.46             | p < 0.001                                                               | p < 0.001 |           | p < 0.001 |
| Run 2.46              | p = 0.025                                                               | NS        | p < 0.001 |           |

**Table S10:** Statistical outcome from One-way ANOVA for repeated measure and post hoc test, with Wolf et al. algorithm and fourth normalization procedure.

| Wolf et al. algorithm | Normalization 4 Anterior-posterior – overall effect of locomotion mode: NS |          |           |          |
|-----------------------|----------------------------------------------------------------------------|----------|-----------|----------|
|                       | Walk 1.79                                                                  | Run 1.79 | Walk 2.46 | Run 2.46 |
| Walk 1.79             |                                                                            | NA       | NA        | NA       |
| Run 1.79              | NA                                                                         |          | NA        | NA       |
| Walk 2.46             | NA                                                                         | NA       |           | NA       |
| Run 2.46              | NA                                                                         | NA       | NA        |          |

  

| Wolf et al. algorithm | Normalization 4 Mediolateral – overall effect of locomotion mode: p = 0.043 |          |           |          |
|-----------------------|-----------------------------------------------------------------------------|----------|-----------|----------|
|                       | Walk 1.79                                                                   | Run 1.79 | Walk 2.46 | Run 2.46 |
| Walk 1.79             |                                                                             | NS       | NS        | NS       |
| Run 1.79              | NS                                                                          |          | NS        | NS       |
| Walk 2.46             | NS                                                                          | NS       |           | NS       |
| Run 2.46              | NS                                                                          | NS       | NS        |          |

  

| Wolf et al. algorithm | Normalization 4 Vertical – overall effect of locomotion mode: p < 0.001 |           |           |           |
|-----------------------|-------------------------------------------------------------------------|-----------|-----------|-----------|
|                       | Walk 1.79                                                               | Run 1.79  | Walk 2.46 | Run 2.46  |
| Walk 1.79             |                                                                         | NS        | p < 0.001 | NS        |
| Run 1.79              | NS                                                                      |           | p < 0.001 | NS        |
| Walk 2.46             | p < 0.001                                                               | p < 0.001 |           | p < 0.001 |
| Run 2.46              | NS                                                                      | NS        | p < 0.001 |           |
